# Supplementary material for: 5′-tRF-19-Q1Q89PJZ Suppresses the Proliferation and Metastasis of Pancreatic Cancer Cells via Regulating Hexokinase 1-Mediated Glycolysis
Source: MDPI journal article supplement (doi:10.3390/biom13101513), 2023-10-12
Supplement: s1 [file s1]

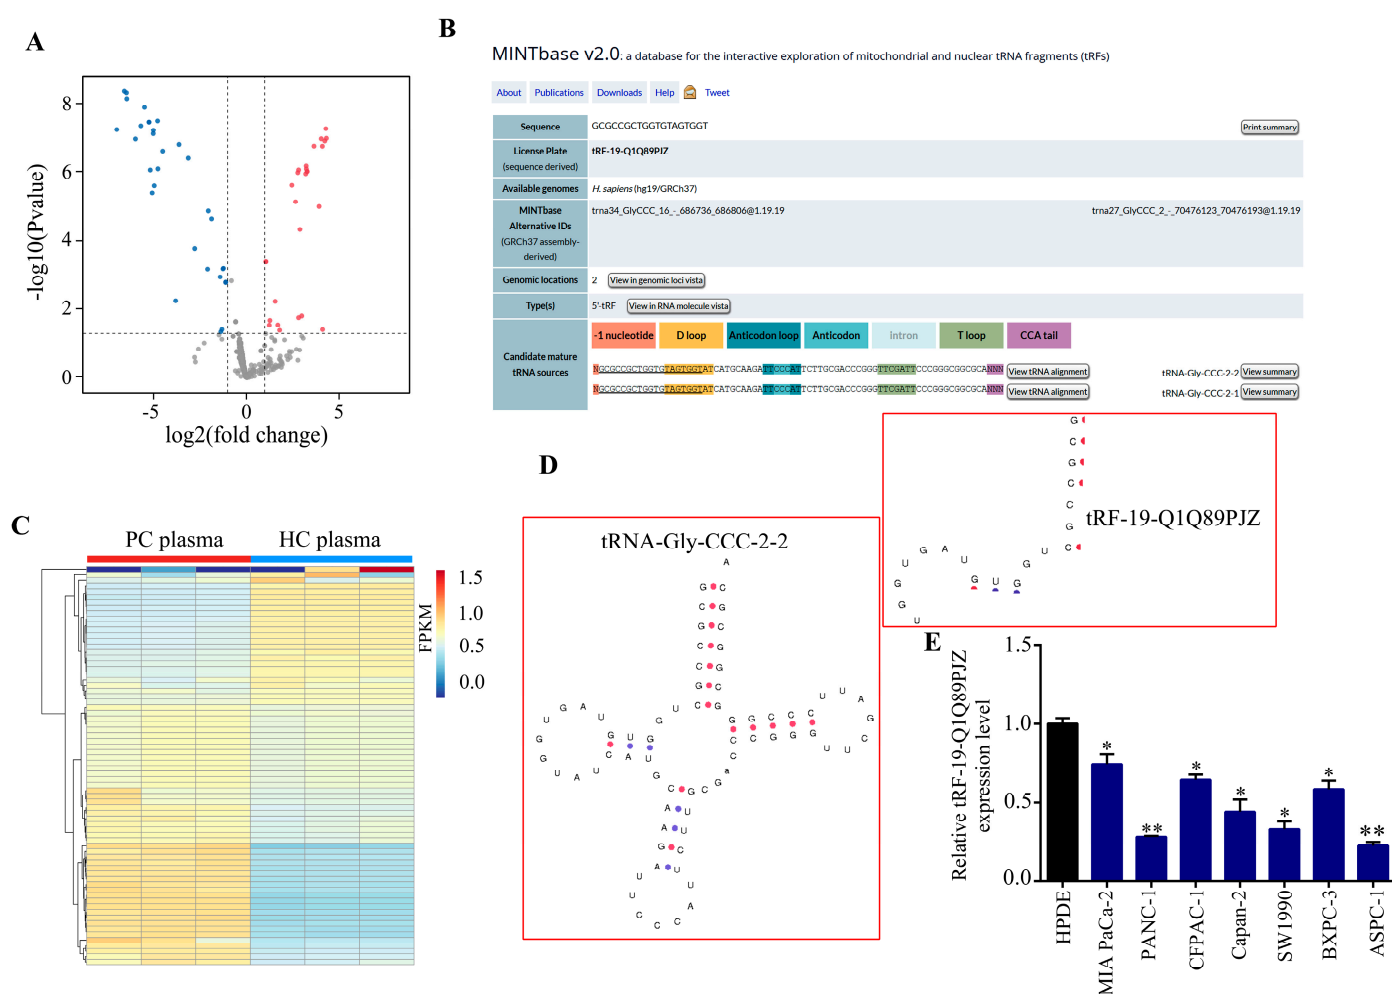

**Figure S1.** tRF-19-Q1Q89PJZ is a type of tRNA-derived fragment. (A) Volcano plot of PC versus HC. Differentially expressed tDRs are indicated in red and green. (B) Heat map of tDRs' expression data obtained from the cancerous and adjacent normal tissues. (C,D) tRF-19-Q1Q89PJZ is derived from the 5'-end of a 17-nt mature tRNA-Gly-CCC-2-2. (D) tRF-19-Q1Q89PJZ structure. (E) qRT-PCR analysis of relative expression levels of tRF-19-Q1Q89PJZ in pancreatic cancer cell lines and HPDE cells.

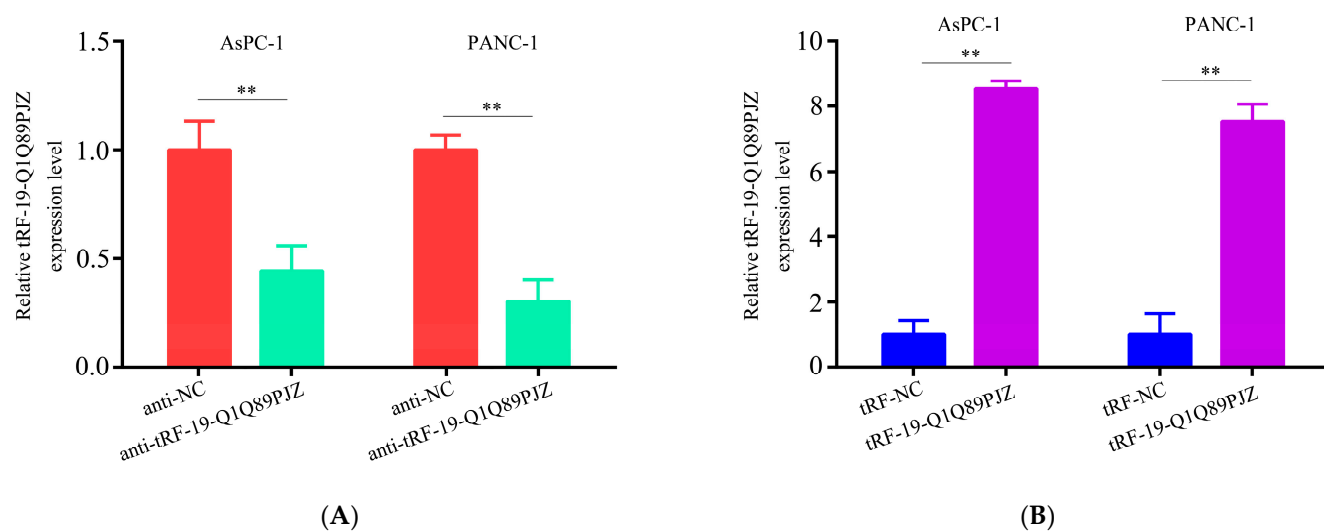

**Figure S2.** tRF-19-Q1Q89PJZ inhibits the proliferation and metastasis of PC cells. (A,B) The transfection efficiencies of tRF-19-Q1Q89PJZ mimics and inhibitors in PC cells were verified by qRT-PCR. \*\*  $p < 0.01$ ,  $n = 3$ . The control group was used for comparison. Data are shown as mean  $\pm$  SD.

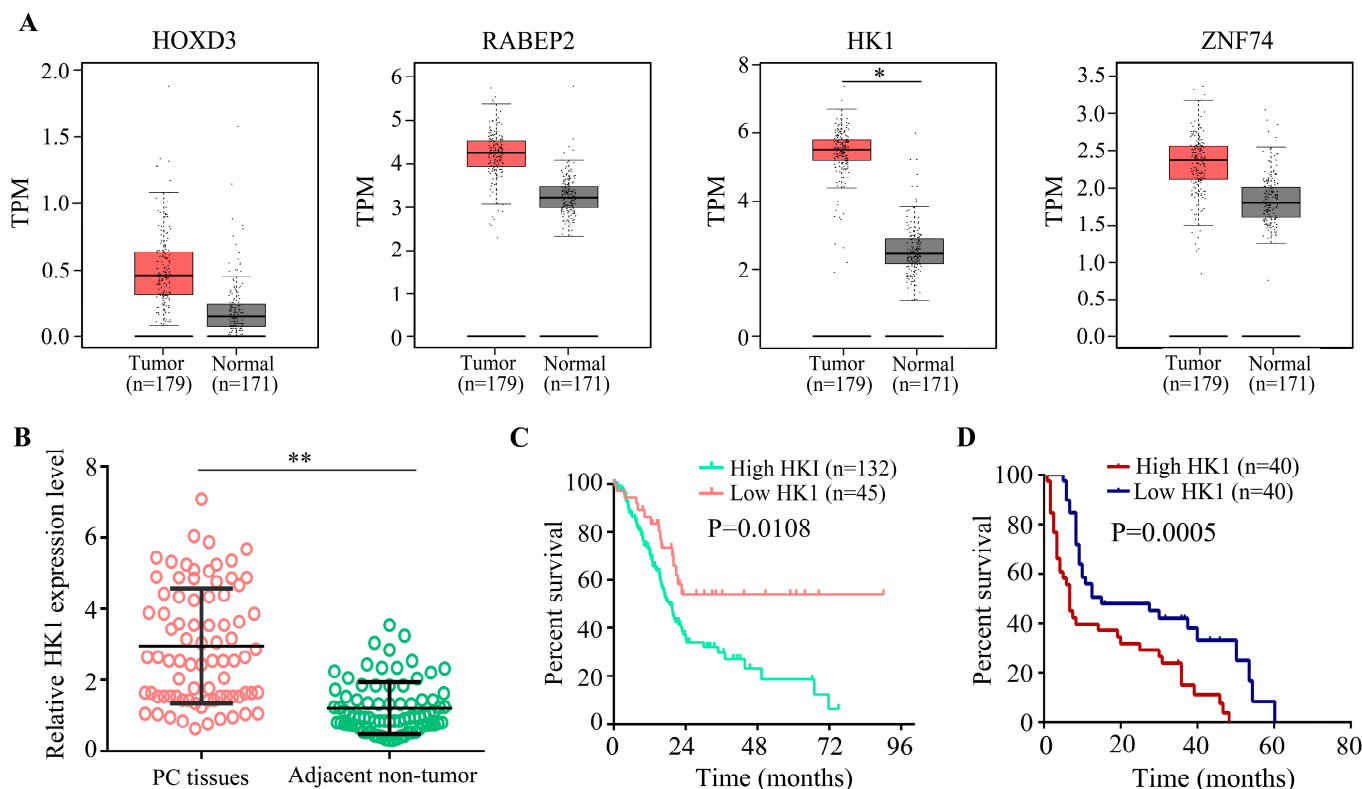

**Figure S3.** HK1 is a target of tRF-19-Q1Q89PJZ in PC. (A) HOXD3, RABEP2, HK1, and ZNF72 expression according to data from the TCGA database. (B) The expression level of HK1 was detected by qRT-PCR in 40 paired PC tissues and adjacent non-cancerous tissues. (C,D) KM plot showing overall survival of patients with low and high HK1 expression according to data from the TCGA database and our research cohort. \*  $p < 0.05$ , \*\*  $p < 0.01$ ,  $n = 3$ . The control group was used for comparison. Data are shown as mean  $\pm$  SD.

**Table S1.** Correlation between pancreatic cancer characteristics and tRF-19-Q1Q89PJZ expression levels.

| tRF-19-Q1Q89PJZ Expression |          |     |      |                |                 |
|----------------------------|----------|-----|------|----------------|-----------------|
| Features                   | <i>n</i> | Low | High | X <sup>2</sup> | <i>p</i> -Value |
| All cases                  | 80       | 40  | 40   |                |                 |
| Age                        |          |     |      | 0.201          | 0.654           |
| <60                        | 42       | 22  | 20   |                |                 |
| ≥60                        | 38       | 18  | 20   |                |                 |
| Gender                     |          |     |      | 0.052          | 0.82            |
| Male                       | 46       | 24  | 23   |                |                 |
| Female                     | 34       | 16  | 17   |                |                 |
| Histological type          |          |     |      | 0.082          | 0.775           |
| Adenocarcinoma             | 65       | 33  | 32   |                |                 |
| Nonadenocarcinoma          | 15       | 7   | 8    |                |                 |
| TNM stage                  |          |     |      | 6.275          | 0.012           |
| I and II                   | 68       | 30  | 38   |                |                 |
| III and IV                 | 12       | 10  | 2    |                |                 |
| Distant metastasis         |          |     |      | 6.347          | 0.012           |
| Negative                   | 71       | 31  | 39   |                |                 |
| Positive                   | 9        | 8   | 1    |                |                 |

|                       |    |    |    |       |       |
|-----------------------|----|----|----|-------|-------|
| Perineural invasion   |    |    |    | 7.5   | 0.006 |
| Negative              | 48 | 18 | 30 |       |       |
| Positive              | 32 | 22 | 10 |       |       |
| Lymph node metastasis |    |    |    | 8.455 | 0.004 |
| No                    | 41 | 14 | 27 |       |       |
| Yes                   | 39 | 26 | 13 |       |       |

**Table S2.** Different proteins overexpressing tRF-19-Q1Q89PJ and tRF-NC AsPC-1 based on the mRNA-Seq results.

| ID         | log2 (FC)    | -log10 (p-Value) |
|------------|--------------|------------------|
| HK1        | -8.958096925 | 0.02188901       |
| HOXD3      | -7.683191273 | 9.61E-08         |
| TRBV13     | -7.278255115 | 2.28E-06         |
| AKT1       | -7.126616945 | 3.72E-06         |
| TERT       | -7.090244874 | 1.17E-16         |
| MTOR       | -7.019838839 | 0.001097199      |
| FLG        | -6.989382062 | 1.08E-05         |
| KIF1A      | -6.626080665 | 0.000187018      |
| LCN15      | -6.511264345 | 0.000209759      |
| AC010327   | -6.427303095 | 0.00051574       |
| CU633967   | -6.182664539 | 1.86E-10         |
| LSP1       | -6.176868862 | 0.012302053      |
| FAM3B      | -6.154749651 | 0.010767062      |
| TMEM37     | -5.962011864 | 0.016008065      |
| IL4I1      | -5.543216429 | 8.17E-05         |
| HBE1       | -5.538007987 | 3.02E-10         |
| SUGCT      | -5.511401153 | 4.31E-07         |
| MYH16      | -5.407388056 | 1.10E-15         |
| PMF1-BGLAP | -5.027928222 | 3.01E-11         |
| Z83844     | -4.955049037 | 0.002213318      |
| MAP1LC3C   | -4.843532905 | 4.77E-31         |
| LINC01224  | -4.769397522 | 5.18E-05         |
| HKDC1      | -4.767715199 | 0.001218492      |
| AC122697   | -4.740271714 | 0.000663165      |
| DOC2A      | -4.399288515 | 1.82E-18         |
| SEMA3D     | -4.386602975 | 2.04E-14         |
| AC026341   | -4.378374333 | 4.85E-12         |
| SNORA77B   | -4.309811337 | 0.000845674      |
| LCE1E      | -4.110579818 | 0.000511758      |
| SH3TC2-DT  | -4.031775064 | 0.002666029      |
| AL807752   | -4.031659089 | 0.014598111      |
| AL353572   | -3.983601887 | 0.005389369      |
| HAS2       | -3.959597165 | 9.63E-18         |
| UPK3BL1    | -3.948983057 | 2.67E-08         |
| HIF1A      | -3.91647225  | 1.63E-14         |
| AL138689   | -3.853595197 | 2.00E-07         |
| AC007383   | -3.794431058 | 0.031504891      |
| KRTAP2-3   | -3.709032739 | 0.012610845      |
| TRBV12-4   | -3.636629404 | 2.12E-33         |
| SNORA40    | -3.630660299 | 0.021524851      |
| ZNF672     | -3.605899028 | 0.00012878       |

|             |              |             |
|-------------|--------------|-------------|
| MX2         | -3.598239255 | 4.45E-10    |
| MYB         | -3.580463932 | 2.55E-10    |
| AL162253    | -3.548999155 | 1.02E-15    |
| RASGRP2     | -3.502541123 | 0.025313843 |
| SNORD88B    | -3.481871741 | 0.000206838 |
| SARDH       | -3.466940974 | 0.000198121 |
| LINC02310   | -3.351849173 | 3.35E-08    |
| AC068587    | -3.341234121 | 5.80E-07    |
| SH3TC2      | -3.286535224 | 2.32E-13    |
| TRBV12-3    | -3.279494354 | 6.29E-13    |
| STARD8      | -3.278768994 | 3.96E-07    |
| BNC2        | -3.237343913 | 3.23E-15    |
| ART5        | -3.16012118  | 0.030428259 |
| PLAU        | -3.156096829 | 1.87E-37    |
| AL359232    | -3.155996174 | 0.003647358 |
| AL031716    | -3.138509114 | 0.047369293 |
| SYN1        | -3.131946455 | 0.010136089 |
| CA9         | -3.103962254 | 0.013701077 |
| OAS1        | -3.081954888 | 1.14E-09    |
| WASH5P      | -3.072797247 | 0.000843792 |
| PRODH       | -3.057823997 | 0.000991185 |
| APLN        | -3.036236402 | 1.01E-13    |
| CENPS-CORT  | -3.017845922 | 0.000756605 |
| MIR155HG    | -2.984182169 | 0.017687301 |
| AC139100    | -2.960332794 | 0.01060555  |
| GAL         | -2.944323975 | 3.44E-20    |
| BSPRY       | -2.943042032 | 0.006739302 |
| BHLHA15     | -2.918895167 | 6.35E-14    |
| AL023803    | -2.918228716 | 0.043459635 |
| AC106845    | -2.908487255 | 5.16E-07    |
| SYS1-DBNDD2 | -2.879207869 | 0.006961189 |
| USP2-AS1    | -2.848695217 | 0.00012138  |
| RGS4        | -2.846715155 | 1.07E-16    |
| HPDL        | -2.840637711 | 3.04E-12    |
| ACSM3       | -2.82569373  | 3.10E-09    |
| AC023593    | -2.812835638 | 4.17E-11    |
| CYP4F3      | -2.809985923 | 0.008856666 |
| CASC19      | -2.798914949 | 4.65E-08    |
| INHBE       | -2.787702179 | 4.10E-06    |
| ADGRE2      | -2.777557726 | 0.005906203 |
| HAS2-AS1    | -2.773383062 | 0.024705143 |
| KCNH3       | -2.753097032 | 0.006070469 |
| ELFN1-AS1   | -2.745736068 | 1.43E-08    |
| LINC01358   | -2.738827934 | 1.05E-20    |
| FGD3        | -2.733607821 | 9.53E-14    |
| CALB2       | -2.732021778 | 5.55E-09    |
| SNORD17     | -2.726989234 | 2.03E-06    |
| SLC2A4      | -2.724087552 | 3.49E-06    |
| DDN         | -2.712455456 | 2.48E-11    |
| TMEM121     | -2.712031478 | 3.50E-05    |
| AL162258    | -2.70721431  | 1.75E-12    |

|            |              |             |
|------------|--------------|-------------|
| LCE1F      | -2.694510005 | 0.003066951 |
| FNDC11     | -2.690575922 | 0.001173517 |
| OAS2       | -2.680742555 | 5.20E-06    |
| AC090673   | -2.666784131 | 0.006957799 |
| WDR4       | -2.650750681 | 6.09E-16    |
| POU5F1B    | -2.627429793 | 0.012294116 |
| NES        | -2.613991341 | 1.94E-16    |
| ZNF295-AS1 | -2.611596204 | 9.47E-11    |
| IPO4       | -2.570576853 | 1.43E-15    |
| PCAT1      | -2.566090346 | 0.001740541 |
| LINC01204  | -2.56411091  | 0.002112839 |
| AC010655   | -2.555468783 | 0.009255842 |
| AC079781   | -2.528879779 | 0.02351109  |
| DCST1      | -2.524476881 | 0.043585921 |
| PARD6G-AS1 | -2.514586765 | 2.80E-07    |
| ITGB3      | -2.512992056 | 0.028596671 |
| PALM3      | -2.510283497 | 2.36E-09    |
| SLC38A5    | -2.503369886 | 1.10E-12    |
| AL109917   | -2.50269241  | 0.011920643 |
| MCM2       | -2.495856371 | 1.20E-09    |
| MYOSLID    | -2.495575874 | 4.07E-05    |
| LRRN4      | -2.478073934 | 2.54E-12    |
| AC125611   | -2.47754369  | 0.018666921 |
| AC012313   | -2.475281207 | 0.015682239 |
| AC138904   | -2.460791693 | 0.013370942 |
| ACTBP11    | -2.453476652 | 0.015981039 |
| SLC19A1    | -2.452297919 | 2.25E-12    |
| TBX6       | -2.448807856 | 3.35E-05    |
| TJP3       | -2.439072345 | 0.02377102  |
| RCN3       | -2.404272199 | 0.000249599 |
| AC069148   | -2.396884402 | 0.028587715 |
| UCP2       | -2.39247274  | 1.29E-10    |
| LCN10      | -2.389473076 | 5.69E-10    |
| AL139156   | -2.389139086 | 0.003947819 |
| AC027307   | -2.385698339 | 3.82E-05    |
| CXCR6      | -2.379912625 | 0.036970526 |
| AC106820   | -2.375654738 | 0.007614374 |
| HGF        | -2.357060361 | 1.46E-09    |
| MCM3       | -2.35629598  | 5.62E-19    |
| SYTL1      | -2.332651525 | 0.000208779 |
| IFITM1     | -2.3260823   | 6.10E-13    |
| MT1L       | -2.325141504 | 3.94E-11    |
| MCM7       | -2.319360425 | 6.65E-12    |
| CKMT1B     | -2.315432591 | 3.44E-11    |
| TNFSF15    | -2.314262472 | 9.64E-05    |
| LINC01812  | -2.293264283 | 8.88E-06    |
| TLR3       | -2.2922559   | 0.000185015 |
| PLCB2      | -2.288852479 | 7.07E-09    |
| NKAIN1     | -2.288559031 | 0.000124058 |
| LARGE2     | -2.262860094 | 1.63E-08    |
| TTN        | -2.256712228 | 5.37E-12    |

|           |              |             |
|-----------|--------------|-------------|
| KRT8P14   | -2.252043406 | 0.005301015 |
| FAM110D   | -2.245531079 | 0.036643858 |
| ZNF664    | -2.235941082 | 2.21E-05    |
| POLE2     | -2.234142217 | 1.46E-05    |
| ZNF467    | -2.220333227 | 1.30E-05    |
| C1QTNF2   | -2.218717112 | 0.038992792 |
| AP002990  | -2.212279268 | 0.037281295 |
| AC005865  | -2.212096689 | 0.001728277 |
| FHAD1     | -2.211651393 | 6.66E-06    |
| CDH15     | -2.208638409 | 7.62E-06    |
| AC097263  | -2.20584524  | 0.000365505 |
| CACNA2D1  | -2.203874132 | 0.000901476 |
| SPATA12   | -2.201369163 | 2.43E-05    |
| ATXN2-AS  | -2.200820775 | 0.038121549 |
| AL359546  | -2.198542187 | 0.001587506 |
| TENT5B    | -2.197998751 | 0.003766816 |
| SNHG20    | -2.18742796  | 4.76E-08    |
| CA12      | -2.180537708 | 9.85E-11    |
| HMGA2-AS1 | -2.165881212 | 0.000578554 |
| RPSAP17   | -2.154842647 | 0.003284491 |
| AC112777  | -2.154540565 | 6.06E-09    |
| RAD54L    | -2.15124983  | 5.45E-07    |
| DIXDC1    | -2.147839473 | 7.76E-06    |
| HSD3B7    | -2.143202203 | 6.89E-05    |
| TFR2      | -2.138709739 | 2.82E-07    |
| RAD9B     | -2.137903264 | 6.42E-05    |
| IL17RE    | -2.134086462 | 7.54E-09    |
| MCM5      | -2.133351218 | 2.74E-12    |
| LMCD1     | -2.127996648 | 1.01E-09    |
| NRM       | -2.127238346 | 2.66E-07    |
| AC007191  | -2.123705767 | 7.58E-10    |
| PDZRN3    | -2.122772993 | 2.28E-10    |
| CLN6      | -2.118429865 | 1.21E-14    |
| AKR7A3    | -2.103281125 | 8.92E-08    |
| AC097658  | -2.103102406 | 0.03858748  |
| NAT16     | -2.097342907 | 4.07E-05    |
| AC087501  | -2.093805838 | 6.83E-05    |
| POLD1     | -2.092663521 | 3.17E-11    |
| AL138999  | -2.092587228 | 0.000147087 |
| LGALS3BP  | -2.091710113 | 2.63E-07    |
| ZBTB12    | -2.088261505 | 1.40E-08    |
| SLC25A10  | -2.079837563 | 1.11E-07    |
| FAM187A   | -2.079699496 | 0.000171244 |
| PAICS     | -2.078141352 | 1.72E-12    |
| NECTIN4   | -2.071981187 | 0.004986447 |
| NTNG2     | -2.068923374 | 2.00E-10    |
| LRRC45    | -2.063806851 | 2.87E-07    |
| LIG1      | -2.061236508 | 1.66E-12    |
| LINC02595 | -2.051396643 | 0.037444616 |
| AC097518  | -2.049351827 | 0.000876275 |
| DNAAF3    | -2.046612352 | 1.25E-06    |

|             |              |             |
|-------------|--------------|-------------|
| MRPS2       | -2.044293005 | 8.06E-07    |
| GAP43       | -2.04033811  | 0.00565501  |
| DERL3       | -2.038787138 | 0.00017137  |
| SORD2P      | -2.038684443 | 4.55E-11    |
| RPSAP52     | -2.036560474 | 0.001035926 |
| FAM81A      | -2.030643514 | 2.08E-05    |
| FAM222A-AS1 | -2.030010395 | 6.50E-05    |
| HELLS       | -2.014000712 | 1.70E-08    |
| TAFA3       | -2.010353718 | 3.65E-05    |
| CCDC74B     | -2.004090203 | 0.000318703 |
| AL359091    | -2.001980275 | 0.003831656 |
| MSN         | -2.000599009 | 1.30E-07    |
| ARRDC4      | 2.007013623  | 2.83E-08    |
| MIR31HG     | 2.009185113  | 5.76E-05    |
| TMEM269     | 2.010518201  | 0.009355446 |
| AC138028    | 2.010632799  | 0.000938261 |
| LIPH        | 2.011983019  | 7.28E-05    |
| SEC31B      | 2.014142026  | 0.000542679 |
| ZSWIM5      | 2.017395534  | 2.81E-11    |
| RNF32-AS1   | 2.017846443  | 0.000322596 |
| DCHS1       | 2.017873494  | 1.11E-05    |
| AC007842    | 2.020896622  | 0.000186664 |
| NOP14-AS1   | 2.02157997   | 6.87E-10    |
| PARD3B      | 2.033826651  | 1.14E-14    |
| AC104825    | 2.033868019  | 2.53E-05    |
| MYOM1       | 2.041559475  | 0.000830724 |
| CCN2        | 2.042471923  | 0.00736744  |
| AL645608    | 2.043794247  | 0.000322212 |
| AC141586    | 2.047433835  | 6.97E-09    |
| RAB30       | 2.048332643  | 1.69E-10    |
| ZNF425      | 2.067589701  | 2.56E-14    |
| AC093525    | 2.073131226  | 8.68E-10    |
| H2AC6       | 2.088562675  | 1.55E-12    |
| COL6A3      | 2.097253824  | 0.025636161 |
| IGIP        | 2.110466898  | 0.000147048 |
| SPAG5-AS1   | 2.114962686  | 1.40E-07    |
| AC024580    | 2.119279575  | 0.000117191 |
| OVGP1       | 2.119937768  | 7.62E-06    |
| AL139220    | 2.124480186  | 0.000123637 |
| CCDC17      | 2.127212537  | 0.002905455 |
| FGF7P6      | 2.131086771  | 2.09E-07    |
| RN7SKP11    | 2.134476691  | 0.000651391 |
| AC005280    | 2.158488841  | 0.005845398 |
| TP53INP1    | 2.15947121   | 9.95E-15    |
| LINC02086   | 2.162724702  | 4.61E-08    |
| H2BC5       | 2.162932997  | 3.73E-11    |
| SEMA3B      | 2.19194221   | 1.89E-05    |
| AC020661    | 2.207451676  | 3.59E-06    |
| COL5A2      | 2.210846116  | 0.000793329 |
| AL139260    | 2.22186202   | 0.000102871 |
| TUBB2B      | 2.233718435  | 0.000125008 |

|           |             |             |
|-----------|-------------|-------------|
| MFAP2     | 2.235261735 | 2.13E-05    |
| NT5E      | 2.245820842 | 1.57E-21    |
| SIPA1L2   | 2.247772491 | 3.58E-07    |
| PIP5K1B   | 2.255943495 | 0.000229417 |
| KLF2      | 2.270297527 | 1.22E-16    |
| TRPC1     | 2.285780347 | 3.14E-08    |
| CFAP70    | 2.287858326 | 2.43E-05    |
| ADAP2     | 2.296480984 | 0.000390838 |
| ANKRD24   | 2.303118281 | 3.92E-07    |
| ZCWPW2    | 2.30454887  | 1.89E-05    |
| AC009108  | 2.30661888  | 4.78E-07    |
| CDRT4     | 2.307045993 | 4.55E-05    |
| YJEFN3    | 2.308324258 | 2.31E-06    |
| PTGS2     | 2.311212289 | 1.42E-17    |
| KCNH6     | 2.327463903 | 0.000144864 |
| MIR22HG   | 2.338072506 | 5.06E-10    |
| AC102953  | 2.36282791  | 2.84E-12    |
| SMIM14    | 2.371461438 | 7.38E-17    |
| EFR3B     | 2.374473534 | 7.33E-09    |
| TRIM74    | 2.374537129 | 0.000966876 |
| AC241952  | 2.385193936 | 6.21E-07    |
| RPLP0P2   | 2.400240132 | 4.86E-11    |
| CFAP53    | 2.400507187 | 9.75E-06    |
| H2BC15    | 2.409945219 | 2.17E-09    |
| AL596244  | 2.429054562 | 0.000115093 |
| SELPLG    | 2.430346982 | 0.014954338 |
| AC007728  | 2.45956857  | 3.06E-05    |
| PCLO      | 2.472900851 | 4.62E-06    |
| ASIC3     | 2.478298357 | 2.54E-08    |
| GCNT4     | 2.482696292 | 1.24E-13    |
| QRICH2    | 2.492305021 | 1.01E-11    |
| EGR2      | 2.499469925 | 1.47E-18    |
| RHOB      | 2.501782697 | 5.70E-13    |
| MIR22     | 2.523183021 | 4.63E-07    |
| SERPINI1  | 2.541671876 | 6.54E-09    |
| AC005586  | 2.561510907 | 3.11E-08    |
| AC046134  | 2.564275076 | 3.07E-07    |
| SEMA3C    | 2.576359004 | 5.47E-07    |
| ZFPM2-AS1 | 2.583450533 | 7.29E-06    |
| AC087741  | 2.592489645 | 5.93E-07    |
| H4C8      | 2.596645104 | 7.19E-19    |
| SDCBP2    | 2.61575836  | 2.92E-18    |
| ATXN1     | 2.621399949 | 9.47E-14    |
| AL139385  | 2.641201943 | 7.45E-12    |
| FCGBP     | 2.651995807 | 2.19E-05    |
| FER1L4    | 2.664225923 | 1.28E-09    |
| AL031118  | 2.674025399 | 0.000556428 |
| FAM217B   | 2.758185134 | 1.25E-06    |
| ISYNA1    | 2.760274971 | 1.18E-08    |
| IL11RA    | 2.770885796 | 1.64E-05    |
| KIF9-AS1  | 2.78375845  | 2.91E-12    |



|           |             |             |
|-----------|-------------|-------------|
| ZNF540    | 2.790949177 | 8.01E-10    |
| AOC2      | 2.798801826 | 8.20E-11    |
| H2BC8     | 2.841707531 | 8.11E-13    |
| AC016876  | 2.893655547 | 2.06E-14    |
| NLGN3     | 2.921636581 | 2.83E-10    |
| UCKL1-AS1 | 2.922571961 | 2.71E-07    |
| NR4A3     | 2.935615251 | 8.00E-14    |
| AC010323  | 3.016469344 | 0.032249446 |
| FRY       | 3.017384481 | 3.66E-10    |
| AC092143  | 3.032594316 | 1.09E-07    |
| AOC3      | 3.037802726 | 3.51E-10    |
| H2BC4     | 3.042201614 | 5.51E-16    |
| ANKFN1    | 3.087341061 | 7.59E-08    |
| HAPLN3    | 3.093064984 | 7.57E-05    |
| CNTN4     | 3.094121039 | 4.08E-06    |
| MZF1-AS1  | 3.100027872 | 1.27E-16    |
| ZNF778    | 3.124074923 | 9.31E-30    |
| KCND1     | 3.12425202  | 5.21E-11    |
| REL       | 3.131550323 | 3.51E-11    |
| UNC13D    | 3.256696539 | 1.30E-06    |
| XYLT1     | 3.293966756 | 0.039184778 |
| DNAH10OS  | 3.315308436 | 3.17E-07    |
| SESN3     | 3.318639742 | 5.72E-11    |
| AC118553  | 3.384831758 | 0.006399731 |
| TMEM217   | 3.612588344 | 8.97E-14    |
| LINC00513 | 3.740716311 | 1.47E-19    |
| COL7A1    | 3.891975189 | 0.009476977 |
| SLC9A3    | 4.181153523 | 0.001726205 |
| PTEN      | 4.852118784 | 0.001068679 |
| TNXB      | 4.980593166 | 2.81E-16    |

**Table S3.** The patients' basic clinical information.

| Patient ID | Gender | Age (y) | Histological Type | TNM Stage | Lymph Node Metastasis | Distant Metastasis | Perinervial Invasion |
|------------|--------|---------|-------------------|-----------|-----------------------|--------------------|----------------------|
| 1          | Female | 43      | Adenocarcinoma    | T1        | N1                    | M0                 | Yes                  |
| 2          | Male   | 57      | Adenocarcinoma    | T3        | N1                    | M1                 | Yes                  |
| 3          | Male   | 75      | Adenocarcinoma    | T1        | N0                    | M0                 | Yes                  |
| 4          | Male   | 80      | Adenocarcinoma    | T1        | N1                    | M0                 | Yes                  |
| 5          | Male   | 50      | Adenocarcinoma    | T1        | N0                    | M0                 | Yes                  |
| 6          | Female | 59      | Adenocarcinoma    | T2        | N0                    | M0                 | Yes                  |
| 7          | Male   | 83      | Nonadenocarcinoma | T3        | N0                    | M0                 | Yes                  |
| 8          | Male   | 59      | Adenocarcinoma    | T2        | N0                    | M0                 | Yes                  |
| 9          | Male   | 65      | Adenocarcinoma    | T1        | N0                    | M0                 | Yes                  |
| 10         | Male   | 50      | Nonadenocarcinoma | T3        | N0                    | M0                 | Yes                  |
| 11         | Male   | 73      | Adenocarcinoma    | T1        | N1                    | M0                 | Yes                  |
| 12         | Male   | 59      | Adenocarcinoma    | T1        | N1                    | M0                 | Yes                  |
| 13         | Female | 72      | Adenocarcinoma    | T3        | N1                    | M1                 | Yes                  |
| 14         | Female | 64      | Adenocarcinoma    | T2        | N1                    | M1                 | Yes                  |
| 15         | Male   | 81      | Adenocarcinoma    | T2        | N0                    | M0                 | Yes                  |
| 16         | Male   | 44      | Nonadenocarcinoma | T3        | N0                    | M0                 | Yes                  |

|    |        |    |                   |    |    |    |     |
|----|--------|----|-------------------|----|----|----|-----|
| 17 | Male   | 57 | Nonadenocarcinoma | T2 | N0 | M0 | Yes |
| 18 | Male   | 78 | Adenocarcinoma    | T1 | N1 | M0 | Yes |
| 19 | Male   | 68 | Adenocarcinoma    | T1 | N1 | M0 | Yes |
| 20 | Female | 58 | Nonadenocarcinoma | T2 | N0 | M0 | Yes |
| 21 | Female | 38 | Nonadenocarcinoma | T2 | N0 | M0 | Yes |
| 22 | Male   | 67 | Adenocarcinoma    | T1 | N0 | M0 | Yes |
| 23 | Male   | 46 | Adenocarcinoma    | T1 | N1 | M0 | Yes |
| 24 | Male   | 66 | Adenocarcinoma    | T1 | N2 | M0 | Yes |
| 25 | Female | 68 | Adenocarcinoma    | T1 | N1 | M0 | Yes |
| 26 | Male   | 48 | Adenocarcinoma    | T3 | N2 | M1 | Yes |
| 27 | Male   | 63 | Adenocarcinoma    | T1 | N1 | M0 | Yes |
| 28 | Female | 63 | Nonadenocarcinoma | T3 | N0 | M1 | Yes |
| 29 | Female | 45 | Adenocarcinoma    | T1 | N2 | M0 | Yes |
| 30 | Male   | 57 | Adenocarcinoma    | T2 | N0 | M0 | Yes |
| 31 | Female | 74 | Adenocarcinoma    | T1 | N1 | M0 | Yes |
| 32 | Male   | 51 | Adenocarcinoma    | T2 | N0 | M0 | Yes |
| 33 | Male   | 73 | Nonadenocarcinoma | T3 | N0 | M0 | Yes |
| 34 | Female | 67 | Nonadenocarcinoma | T3 | N0 | M0 | Yes |
| 35 | Female | 56 | Adenocarcinoma    | T3 | N1 | M1 | Yes |
| 36 | Male   | 80 | Adenocarcinoma    | T1 | N1 | M0 | Yes |
| 37 | Male   | 74 | Adenocarcinoma    | T1 | N1 | M0 | Yes |
| 38 | Male   | 49 | Adenocarcinoma    | T1 | N0 | M0 | Yes |
| 39 | Male   | 71 | Adenocarcinoma    | T1 | N1 | M0 | Yes |
| 40 | Male   | 36 | Adenocarcinoma    | T1 | N0 | M0 | NO  |
| 41 | Male   | 59 | Adenocarcinoma    | T1 | N2 | M0 | NO  |
| 42 | Female | 50 | Adenocarcinoma    | T2 | N1 | M1 | NO  |
| 43 | Male   | 59 | Adenocarcinoma    | T1 | N0 | M0 | NO  |
| 44 | Female | 71 | Adenocarcinoma    | T1 | N0 | M0 | NO  |
| 45 | Female | 55 | Adenocarcinoma    | T2 | N0 | M0 | NO  |
| 46 | Male   | 80 | Adenocarcinoma    | T1 | N1 | M0 | NO  |
| 47 | Female | 68 | Adenocarcinoma    | T1 | N1 | M0 | NO  |
| 48 | Female | 56 | Adenocarcinoma    | T1 | N1 | M0 | NO  |
| 49 | Female | 72 | Nonadenocarcinoma | T3 | N0 | M0 | NO  |
| 50 | Male   | 71 | Adenocarcinoma    | T1 | N1 | M0 | NO  |
| 51 | Male   | 57 | Adenocarcinoma    | T1 | N0 | M0 | NO  |
| 52 | Female | 43 | Adenocarcinoma    | T1 | N1 | M0 | NO  |
| 53 | Female | 34 | Adenocarcinoma    | T2 | N0 | M0 | NO  |
| 54 | Male   | 51 | Adenocarcinoma    | T2 | N0 | M0 | NO  |
| 55 | Male   | 67 | Adenocarcinoma    | T1 | N1 | M0 | NO  |
| 56 | Female | 65 | Adenocarcinoma    | T1 | N2 | M0 | NO  |
| 57 | Female | 77 | Adenocarcinoma    | T1 | N0 | M0 | NO  |
| 58 | Female | 59 | Adenocarcinoma    | T1 | N1 | M0 | NO  |
| 59 | Male   | 57 | Nonadenocarcinoma | T1 | N0 | M0 | NO  |
| 60 | Male   | 59 | Adenocarcinoma    | T1 | N1 | M0 | NO  |
| 61 | Male   | 55 | Adenocarcinoma    | T1 | N1 | M0 | NO  |
| 62 | Female | 58 | Adenocarcinoma    | T2 | N2 | M1 | NO  |
| 63 | Female | 72 | Adenocarcinoma    | T1 | N1 | M0 | NO  |
| 64 | Male   | 65 | Nonadenocarcinoma | T1 | N0 | M0 | NO  |
| 65 | Female | 48 | Adenocarcinoma    | T1 | N1 | M0 | NO  |
| 66 | Female | 57 | Adenocarcinoma    | T1 | N1 | M0 | NO  |
| 67 | Male   | 56 | Adenocarcinoma    | T1 | N2 | M0 | NO  |

|    |        |    |                   |    |    |    |    |
|----|--------|----|-------------------|----|----|----|----|
| 68 | Male   | 57 | Adenocarcinoma    | T2 | N0 | M0 | NO |
| 69 | Female | 62 | Adenocarcinoma    | T1 | N1 | M0 | NO |
| 70 | Female | 74 | Adenocarcinoma    | T1 | N0 | M0 | NO |
| 71 | Male   | 41 | Adenocarcinoma    | T2 | N0 | M0 | NO |
| 72 | Female | 56 | Adenocarcinoma    | T2 | N0 | M0 | NO |
| 73 | Male   | 59 | Adenocarcinoma    | T1 | N0 | M0 | NO |
| 74 | Female | 48 | Adenocarcinoma    | T1 | N0 | M0 | NO |
| 75 | Male   | 59 | Nonadenocarcinoma | T2 | N0 | M0 | NO |
| 76 | Male   | 62 | Adenocarcinoma    | T2 | N0 | M0 | NO |
| 77 | Female | 62 | Adenocarcinoma    | T1 | N1 | M0 | NO |
| 78 | Female | 80 | Nonadenocarcinoma | T2 | N0 | M0 | NO |
| 79 | Female | 85 | Adenocarcinoma    | T1 | N0 | M0 | NO |
| 80 | Male   | 77 | Nonadenocarcinoma | T2 | N0 | M0 | NO |

\* T1: maximum tumor diameter (cm)  $\leq 2$ ; T2: maximum tumor diameter (cm) 2 to 4; T3: maximum tumor diameter (cm)  $\geq 4$ ; N0: no regional lymph node metastases; N1: metastasis in 1 to 3 regional lymph nodes; N2: metastasis in  $\geq 4$  regional lymph nodes; M0: Primary; M1: Metastasis.
